# Supplementary material for: Mortality Risk in Acute Ischemic Stroke Patients With Large Vessel Occlusion Treated With Mechanical Thrombectomy
Source: PubMed Central journal article supplement — J Am Heart Assoc. 2019 Oct 28;8(21):e014425. doi: 10.1161/JAHA.119.014425 (PMC6898819; doi:10.1161/jaha.119.014425), 2019-10-28
Supplement: JAH3-8-e014425-s001.pdf [file JAH3-8-e014425-s001.pdf]

# **SUPPLEMENTAL MATERIAL**

## Data S1.

### Complete search algorithm used in MEDLINE search

((endovascular[All Fields] AND ("therapy"[Subheading] OR "therapy"[All Fields] OR "therapeutics"[MeSH Terms] OR "therapeutics"[All Fields])) OR (endovascular[All Fields] AND ("therapy"[Subheading] OR "therapy"[All Fields] OR "treatment"[All Fields] OR "therapeutics"[MeSH Terms] OR "therapeutics"[All Fields])) OR (endovascular[All Fields] AND ("reperfusion"[MeSH Terms] OR "reperfusion"[All Fields] OR ("reperfusion"[All Fields] AND "therapy"[All Fields]) OR "reperfusion therapy"[All Fields])) OR (mechanical[All Fields] AND ("thrombectomy"[MeSH Terms] OR "thrombectomy"[All Fields])) OR ("thrombectomy"[MeSH Terms] OR "thrombectomy"[All Fields]) OR (("stents"[MeSH Terms] OR "stents"[All Fields] OR "stent"[All Fields]) AND retriever[All Fields]) OR thromboaspiration[All Fields]) AND ((acute[All Fields] AND ("ischemia"[MeSH Terms] OR "ischemia"[All Fields] OR "ischemic"[All Fields]) AND ("stroke"[MeSH Terms] OR "stroke"[All Fields])) OR ("brain ischemia"[MeSH Terms] OR ("brain"[All Fields] AND "ischemia"[All Fields]) OR "brain ischemia"[All Fields] OR ("cerebrovascular"[All Fields] AND "ischemia"[All Fields]) OR "cerebrovascular ischemia"[All Fields]) OR ("stroke"[MeSH Terms] OR "stroke"[All Fields]) OR (large[All Fields] AND ("blood vessels"[MeSH Terms] OR ("blood"[All Fields] AND "vessels"[All Fields]) OR "blood vessels"[All Fields] OR "vessel"[All Fields]) AND ("dental occlusion"[MeSH Terms] OR ("dental"[All Fields] AND "occlusion"[All Fields]) OR "dental occlusion"[All Fields] OR "occlusion"[All Fields]))) AND ((Clinical Trial[ptyp] OR Clinical Trial, Phase I[ptyp] OR Clinical Trial, Phase II[ptyp] OR Clinical Trial, Phase III[ptyp] OR Clinical Trial, Phase IV[ptyp] OR Randomized Controlled Trial[ptyp]) AND "humans"[MeSH Terms])

**Table S1. Excluded studies from the meta-analysis with reason(s) for exclusion.**

| <b>Study name</b> | <b>Reason for exclusion</b>                                                                                                                           |
|-------------------|-------------------------------------------------------------------------------------------------------------------------------------------------------|
| IMS III [1]       | first generation thrombectomy devices used                                                                                                            |
| MR RESCUE [2]     | first generation thrombectomy devices used                                                                                                            |
| SYNTHESIS [3]     | first generation thrombectomy devices used / possibility of enrolled patients without LVO                                                             |
| EASI [4]          | possibility of enrolled patients without LVO (baseline vascular imaging was available in 80% of patients)/ neither masking nor blinding were required |

---

LVO: large vessel occlusion

**Table S2. Meta-regression analyses on the association of all-cause mortality at 3 months with patient and procedure characteristics.**

| <b>Variable</b>                      | <b>Coefficient (95%CI)</b> | <b>p-value</b> |
|--------------------------------------|----------------------------|----------------|
| Age                                  | -0.05 (-0.15, 0.04)        | 0.254          |
| Female sex                           | 0.01 (-0.03, 0.04)         | 0.702          |
| Systolic blood pressure on admission | -0.02 (-0.12, 0.08)        | 0.601          |
| Admission glucose                    | -0.39 (-0.40, 1.17)        | 0.277          |
| Onset to groin puncture time         | 0.01 (-0.06, 0.06)         | 0.985          |
| IVT pretreatment                     | 0.01 (-0.01, 0.02)         | 0.804          |
| General anesthesia                   | -0.01 (-0.02, 0.01)        | 0.735          |
| Successful reperfusion               | -0.01 (-0.03, 0.02)        | 0.663          |

IVT: intravenous thrombolysis, 95%CI: 95% confidence interval

**Table S3. Overview of meta-analyses on the association of mechanical thrombectomy with 3-month mortality according to sample size.**

| <b>Study</b>          | <b>N of studies</b> | <b>N of patients</b> | <b>Mortality (MT)</b> | <b>Mortality (BMT)</b> | <b>RR (95%CI)</b> |
|-----------------------|---------------------|----------------------|-----------------------|------------------------|-------------------|
| Goyal et al, 2016 [5] | 5                   | 1309                 | 15.3% (97/633)        | 18.9% (122/646)        | 0.82 (0.63–1.07)  |
| Roman et al, 2018 [6] | 7                   | 1754                 | 14.7% (128/870)       | 17.3% (153/884)        | 0.85 (0.69-1.05)  |
| Katsanos et al        | 11                  | 2460                 | 15.8% (194/1228)      | 19.3% (238/ 1232)      | 0.83 (0.69-0.99)  |

MT: mechanical thrombectomy, BMT: best medical treatment, RR: risk ratio

Figure S1. Flow chart presenting the selection of eligible studies.

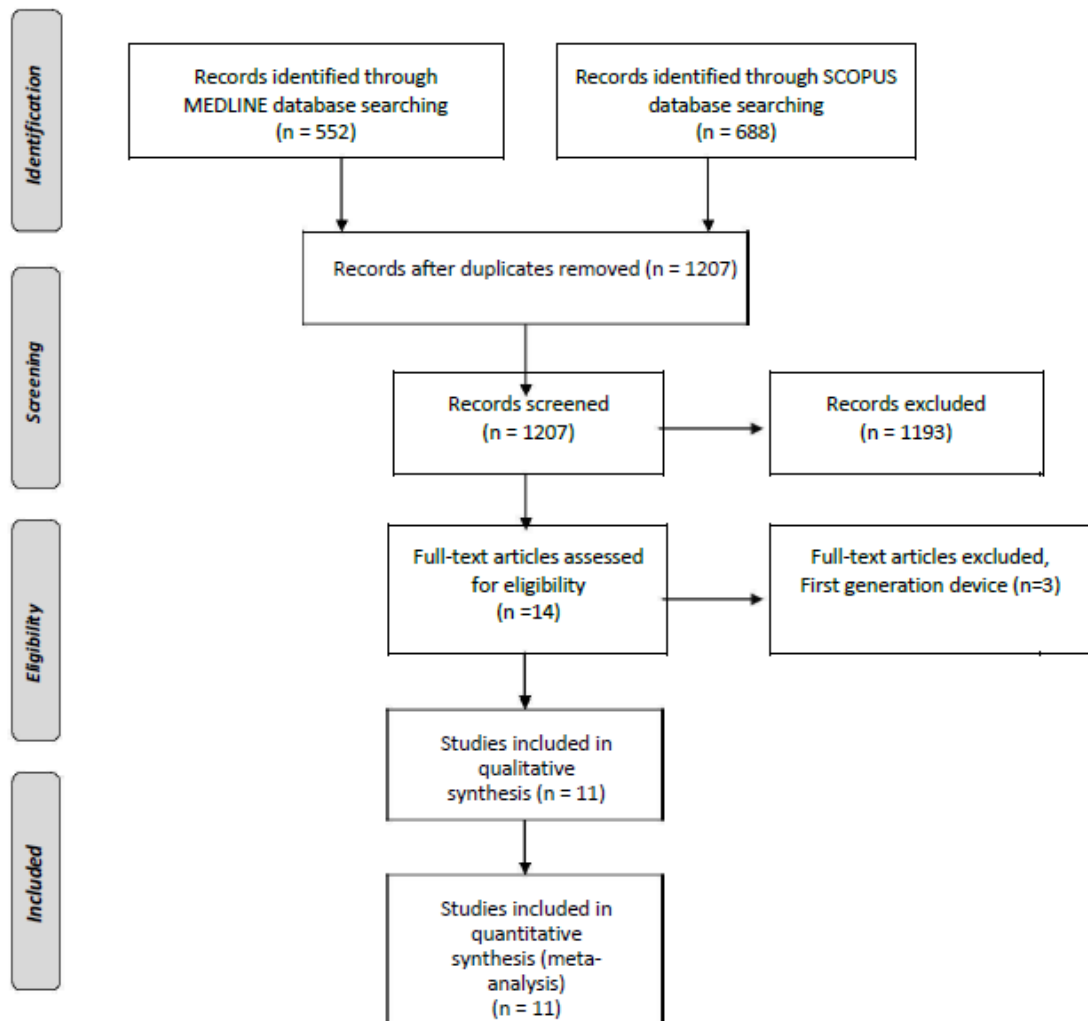

**Figure S2. Risk of bias summary that reviews authors' judgments about each risk of bias item for each included study.**

|             | Random sequence generation (selection bias) | Allocation concealment (selection bias) | Blinding of participants and personnel (performance bias) | Blinding of outcome assessment (detection bias) | Incomplete outcome data (attrition bias) | Selective reporting (reporting bias) | Other bias |
|-------------|---------------------------------------------|-----------------------------------------|-----------------------------------------------------------|-------------------------------------------------|------------------------------------------|--------------------------------------|------------|
| DAWN        | +                                           | +                                       | -                                                         | +                                               | +                                        | +                                    | +          |
| DEFUSE 3    | +                                           | +                                       | -                                                         | +                                               | +                                        | +                                    | +          |
| ESCAPE      | +                                           | +                                       | -                                                         | +                                               | +                                        | +                                    | +          |
| EXTEND-IA   | +                                           | +                                       | -                                                         | +                                               | +                                        | +                                    | +          |
| MR CLEAN    | +                                           | +                                       | -                                                         | +                                               | +                                        | +                                    | +          |
| PISTE       | +                                           | +                                       | -                                                         | +                                               | +                                        | +                                    | +          |
| RESILIENT   | ?                                           | ?                                       | -                                                         | +                                               | ?                                        | +                                    | ?          |
| REVASCAT    | +                                           | +                                       | -                                                         | +                                               | +                                        | +                                    | +          |
| SWIFT PRIME | +                                           | +                                       | -                                                         | +                                               | +                                        | +                                    | +          |
| THERAPY     | +                                           | +                                       | -                                                         | +                                               | +                                        | +                                    | +          |
| THRACE      | +                                           | +                                       | -                                                         | -                                               | +                                        | +                                    | +          |

**Figure S3. Risk of bias graph that reviews authors' judgments about each risk of bias item presented as percentages across all included studies.**

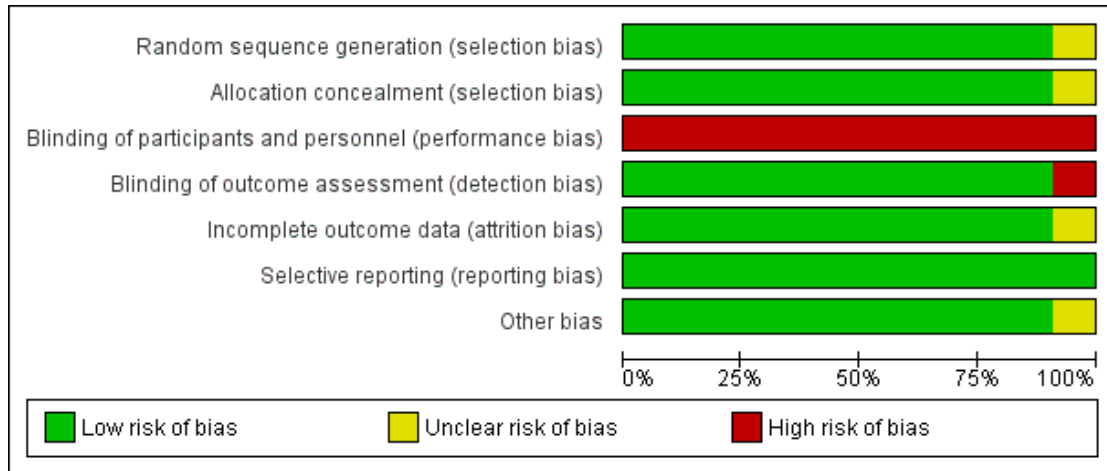



**Figure S4. Funnel plot of included studies.**

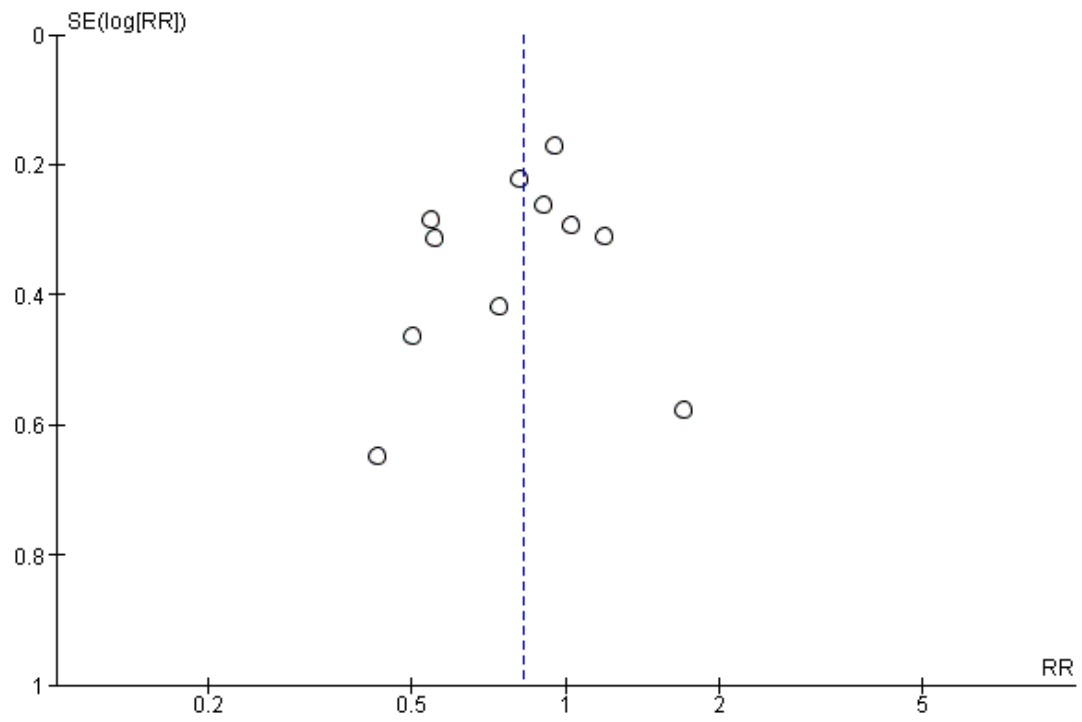

**Figure S5. Mortality rate in patients receiving mechanical thrombectomy plus best medical treatment, calculated using double arcsine Freeman-Tukey transformation (FTT).**

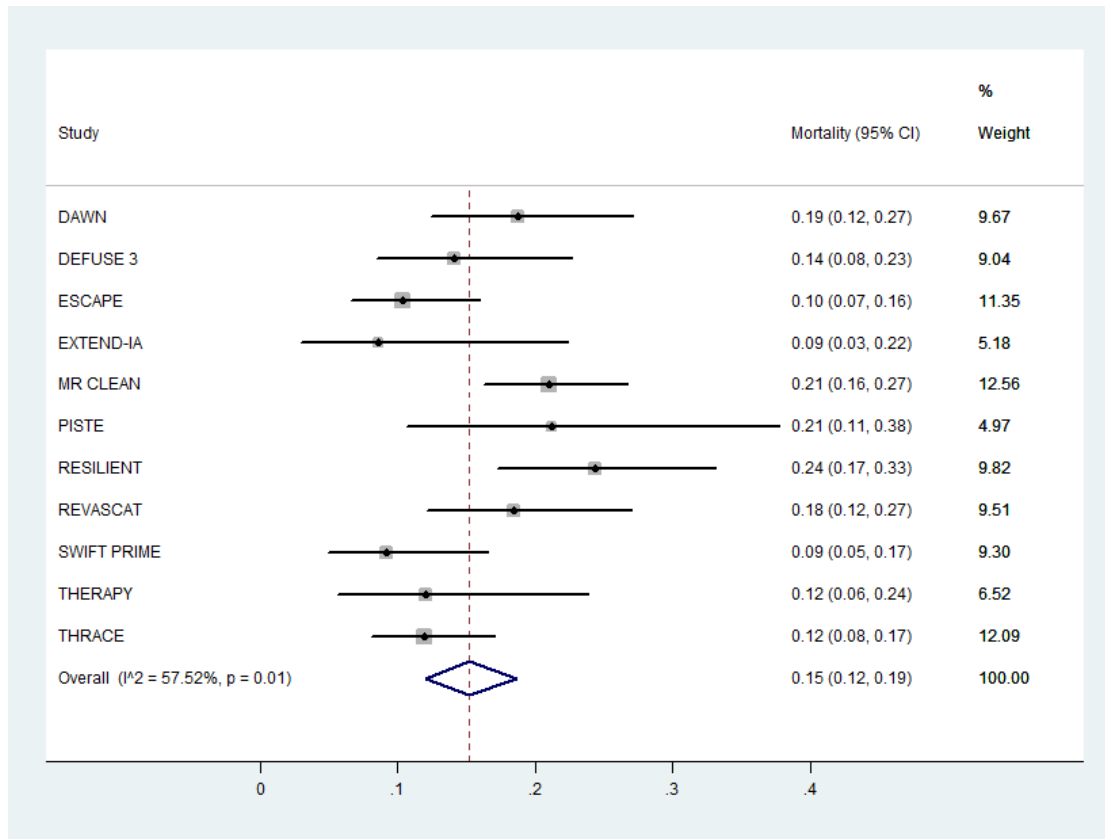

**Figure S6. Mortality rate in patients receiving best medical treatment alone, calculated using double arcsine Freeman-Tukey transformation (FTT).**

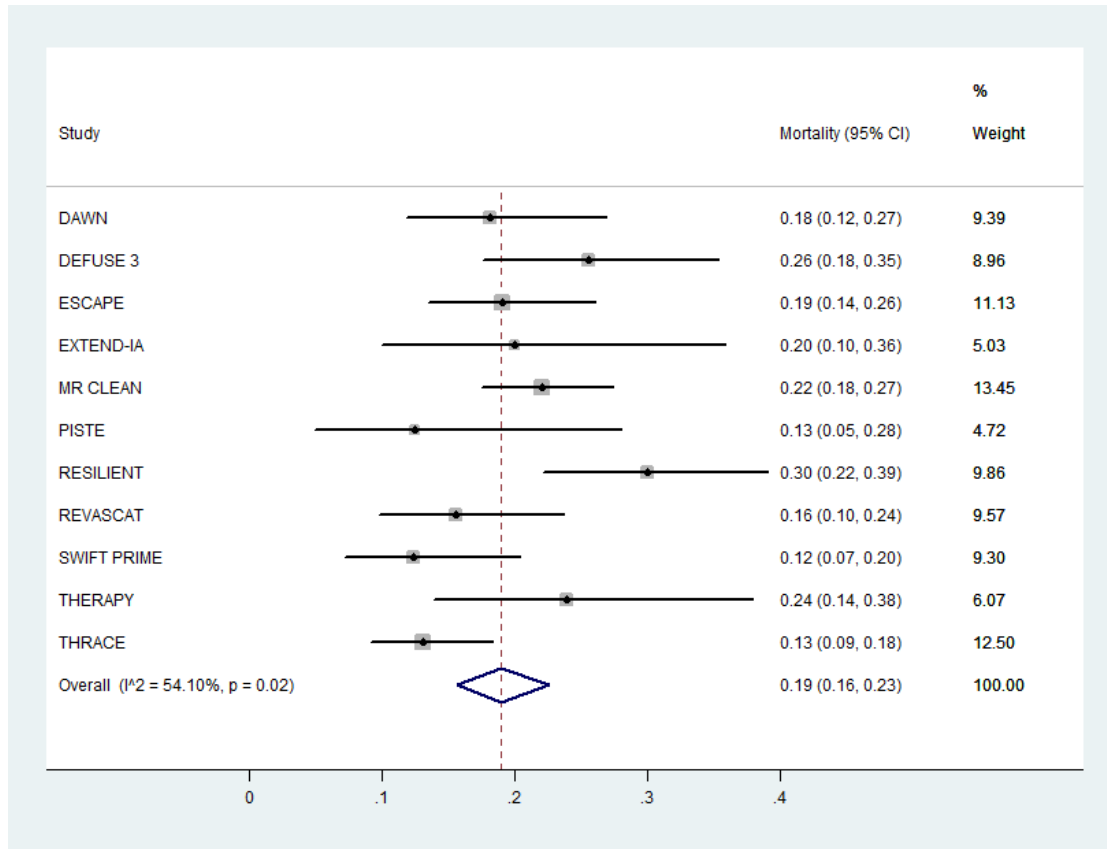

## Supplemental References:

1. Broderick JP, Palesch YY, Demchuk AM, Yeatts SD, Khatri P, Hill MD, Jauch EC, Jovin TG, Yan B, Silver FL, von Kummer R, Molina CA, Demaerschalk BM, Budzik R, Clark WM, Zaidat OO, Malisch TW, Goyal M, Schonewille WJ, Mazighi M, Engelter ST, Anderson C, Spilker J, Carrozzella J, Ryckborst KJ, Janis LS, Martin RH, Foster LD, Tomsick TA; Interventional Management of Stroke (IMS) III Investigators. Endovascular therapy after intravenous t-PA versus t-PA alone for stroke. *N Engl J Med.* 2013; 368:893-903.
2. Kidwell CS, Jahan R, Gornbein J, Alger JR, Nenov V, Ajani Z, Feng L, Meyer BC, Olson S, Schwamm LH, Yoo AJ, Marshall RS, Meyers PM, Yavagal DR, Wintermark M, Guzy J, Starkman S, Saver JL; MR RESCUE Investigators. A trial of imaging selection and endovascular treatment for ischemic stroke. *N Engl J Med.* 2013;368:914-23.
3. Ciccone A, Valvassori L, Nichelatti M, Sgoifo A, Ponzio M, Sterzi R, Boccardi E; SYNTHESIS Expansion Investigators. Endovascular treatment for acute ischemic stroke. *N Engl J Med.* 2013;368:904-13.
4. Khoury NN, Darsaut TE, Ghostine J, Deschaintre Y, Daneault N, Durocher A, Lanthier S, Poppe AY, Odier C, Lebrun LH, Guilbert F, Gentric JC, Batista A, Weill A, Roy D, Bracard S, Raymond J; EASI trial collaborators. Endovascular thrombectomy and medical therapy versus medical therapy alone in acute stroke: A randomized care trial. *J Neuroradiol.* 2017;44:198-202.
5. Goyal M, Menon BK, van Zwam WH, Dippel DW, Mitchell PJ, Demchuk AM, Dávalos A, Majoie CB, van der Lugt A, de Miquel MA, Donnan GA, Roos YB, Bonafe A, Jahan R, Diener HC, van den Berg LA, Levy EI, Berkhemer OA, Pereira VM, Rempel J, Millán M, Davis SM, Roy D, Thornton J, Román LS, Ribó M, Beumer D, Stouch B, Brown S, Campbell BC, van Oostenbrugge RJ, Saver JL, Hill MD, Jovin TG; HERMES collaborators. Endovascular thrombectomy after large-vessel ischaemic stroke: a meta-analysis of individual patient data from five randomised trials. *Lancet.* 2016;387:1723-31.
6. Román LS, Menon BK, Blasco J, Hernández-Pérez M, Dávalos A, Majoie CBLM, Campbell BCV, Guillemin F, Lingsma H, Anxionnat R, Epstein J, Saver JL, Marquering H, Wong JH, Lopes D, Reimann G, Desal H, Dippel DWJ, Coutts S, du Mesnil de Rochemont R, Yavagal D, Ferre JC, Roos YBWEM, Liebeskind DS, Lenthall R, Molina C, Al Ajlan FS, Reddy V, Dowlatshahi D, Sourour NA, Oppenheim C, Mitha AP, Davis SM, Weimar C, van Oostenbrugge RJ, Cobo E, Kleinig TJ, Donnan

- GA, van der Lugt A, Demchuk AM, Berkhemer OA, Boers AMM, Ford GA, Muir KW, Brown BS, Jovin T, van Zwam WH, Mitchell PJ, Hill MD, White P, Bracard S, Goyal M; HERMES collaborators. Imaging features and safety and efficacy of endovascular stroke treatment: a meta-analysis of individual patient-level data. *Lancet Neurol.* 2018;17:895-904.
7. Nogueira RG, Jadhav AP, Haussen DC, Bonafe A, Budzik RF, Bhuva P, Yavagal DR, Ribo M, Cognard C, Hanel RA, Sila CA, Hassan AE, Millan M, Levy EI, Mitchell P, Chen M, English JD, Shah QA, Silver FL, Pereira VM, Mehta BP, Baxter BW, Abraham MG, Cardona P, Veznedaroglu E, Hellinger FR, Feng L, Kirmani JF, Lopes DK, Jankowitz BT, Frankel MR, Costalat V, Vora NA, Yoo AJ, Malik AM, Furlan AJ, Rubiera M, Aghaebrahim A, Olivot JM, Tekle WG, Shields R, Graves T, Lewis RJ, Smith WS, Liebeskind DS, Saver JL, Jovin TG; DAWN Trial Investigators.. Thrombectomy 6 to 24 Hours after Stroke with a Mismatch between Deficit and Infarct. *N Engl J Med.* 2018;378:11-21.
  8. Albers GW, Marks MP, Kemp S, Christensen S, Tsai JP, Ortega-Gutierrez S, McTaggart RA, Torbey MT, Kim-Tenser M, Leslie-Mazwi T, Sarraj A, Kasner SE, Ansari SA, Yeatts SD, Hamilton S, Mlynash M, Heit JJ, Zaharchuk G, Kim S, Carrozzella J, Palesch YY, Demchuk AM, Bammer R, Lavori PW, Broderick JP, Lansberg MG; DEFUSE 3 Investigators. Thrombectomy for Stroke at 6 to 16 Hours with Selection by Perfusion Imaging. *N Engl J Med.* 2018;378:708-718.
  9. Goyal M, Demchuk AM, Menon BK, Eesa M, Rempel JL, Thornton J, Roy D, Jovin TG, Willinsky RA, Sapkota BL, Dowlatshahi D, Frei DF, Kamal NR, Montanera WJ, Poppe AY, Ryckborst KJ, Silver FL, Shuaib A, Tampieri D, Williams D, Bang OY, Baxter BW, Burns PA, Choe H, Heo JH, Holmstedt CA, Jankowitz B, Kelly M, Linares G, Mandzia JL, Shankar J, Sohn SI, Swartz RH, Barber PA, Coutts SB, Smith EE, Morrish WF, Weill A, Subramaniam S, Mitha AP, Wong JH, Lowerison MW, Sajobi TT, Hill MD; ESCAPE Trial Investigators. Randomized assessment of rapid endovascular treatment of ischemic stroke. *N Engl J Med.* 2015;372:1019-30.

- 10.** Campbell BC, Mitchell PJ, Kleinig TJ, Dewey HM, Churilov L, Yassi N, Yan B, Dowling RJ, Parsons MW, Oxley TJ, Wu TY, Brooks M, Simpson MA, Miteff F, Levi CR, Krause M, Harrington TJ, Faulder KC, Steinfort BS, Priglinger M, Ang T, Scroop R, Barber PA, McGuinness B, Wijeratne T, Phan TG, Chong W, Chandra RV, Bladin CF, Badve M, Rice H, de Villiers L, Ma H, Desmond PM, Donnan GA, Davis SM; EXTEND-IA Investigators. Endovascular therapy for ischemic stroke with perfusion-imaging selection. *N Engl J Med.* 2015; 372:1009-18.
- 11.** Berkhemer OA, Fransen PS, Beumer D, van den Berg LA, Lingsma HF, Yoo AJ, Schonewille WJ, Vos JA, Nederkoorn PJ, Wermer MJ, van Walderveen MA, Staals J, Hofmeijer J, van Oostayen JA, Lycklama à Nijeholt GJ, Boiten J, Brouwer PA, Emmer BJ, de Bruijn SF, van Dijk LC, Kappelle LJ, Lo RH, van Dijk EJ, de Vries J, de Kort PL, van Rooij WJ, van den Berg JS, van Hasselt BA, Aerden LA, Dallinga RJ, Visser MC, Bot JC, Vroomen PC, Eshghi O, Schreuder TH, Heijboer RJ, Keizer K, Tielbeek AV, den Hertog HM, Gerrits DG, van den Berg-Vos RM, Karas GB, Steyerberg EW, Flach HZ, Marquering HA, Sprengers ME, Jenniskens SF, Beenen LF, van den Berg R, Koudstaal PJ, van Zwam WH, Roos YB, van der Lugt A, van Oostenbrugge RJ, Majoie CB, Dippel DW; MR CLEAN Investigators. A randomized trial of intraarterial treatment for acute ischemic stroke. *N Engl J Med.* 2015; 372:11-20.
- 12.** Muir KW, Ford GA, Messow CM, Ford I, Murray A, Clifton A, Brown MM, Madigan J, Lenthal R, Robertson F, Dixit A, Cloud GC, Wardlaw J, Freeman J, White P; PISTE Investigators. Endovascular therapy for acute ischaemic stroke: the Pragmatic Ischaemic Stroke Thrombectomy Evaluation (PISTE) randomised, controlled trial. *J Neurol Neurosurg Psychiatry.* 2017;88:38-44.
- 13.** Martins S, Mont'Alvern F, Pontes-Neto O, Rebello LC, Silva GS, Lima F, Abud DG, de Sousa Mendes Parente B, Frudit ME, de Barros Faria M, de Carvalho JFF, Zetola VF, de Assis Barbosa L, Cardoso FB, de Souza AC, Carbonera LA, Filho JO, Bezerra D, Liebeskind D, Nogueira RG. Randomization of endovascular treatment with stent-retriever and/or thromboaspiration vs. best medical therapy in acute ischemic stroke

due to large vessel occlusion trial (RESILIENT): Final results (ESOC19-2403). *Eur Stroke J* 2019;4:781.

14. Jovin TG, Chamorro A, Cobo E, de Miquel MA, Molina CA, Rovira A, San Román L, Serena J, Abilleira S, Ribó M, Millán M, Urra X, Cardona P, López-Cancio E, Tomasello A, Castaño C, Blasco J, Aja L, Dorado L, Quesada H, Rubiera M, Hernandez-Pérez M, Goyal M, Demchuk AM, von Kummer R, Gallofré M, Dávalos A; REVASCAT Trial Investigators. Thrombectomy within 8 hours after symptom onset in ischemic stroke. *N Engl J Med*. 2015; 372:2296-2306.
15. Saver JL, Goyal M, Bonafe A, Diener HC, Levy EI, Pereira VM, Albers GW, Cognard C, Cohen DJ, Hacke W, Jansen O, Jovin TG, Mattle HP, Nogueira RG, Siddiqui AH, Yavagal DR, Baxter BW, Devlin TG, Lopes DK, Reddy VK, du Mesnil de Rochemont R, Singer OC, Jahan R; SWIFT PRIME Investigators. Stent-retriever thrombectomy after intravenous t-PA vs. t-PA alone in stroke. *N Engl J Med*. 2015;372:2285-95.
16. Mocco J, Zaidat OO, von Kummer R, Yoo AJ, Gupta R, Lopes D, Frei D, Shownkeen H, Budzik R, Ajani ZA, Grossman A, Altschul D, McDougall C, Blake L, Fitzsimmons BF, Yavagal D, Terry J, Farkas J, Lee SK, Baxter B, Wiesmann M, Knauth M, Heck D, Hussain S, Chiu D, Alexander MJ, Malisch T, Kirmani J, Miskolczi L, Khatri P; THERAPY Trial Investigators. Aspiration Thrombectomy After Intravenous Alteplase Versus Intravenous Alteplase Alone. *Stroke*. 2016;47:2331-8.
17. Bracard S, Ducrocq X, Mas JL, Soudant M, Oppenheim C, Moulin T, Guillemin F; THRACE investigators. Mechanical thrombectomy after intravenous alteplase versus alteplase alone after stroke (THRACE): a randomised controlled trial. *Lancet Neurol*. 2016;15:1138-47.
